# Supplementary material
Source: Springer Nature journal article supplement (https://www.springermedizin.de/resource/supplementary/13063_2011_766_MOESM1_ESM.pdf/9618670)

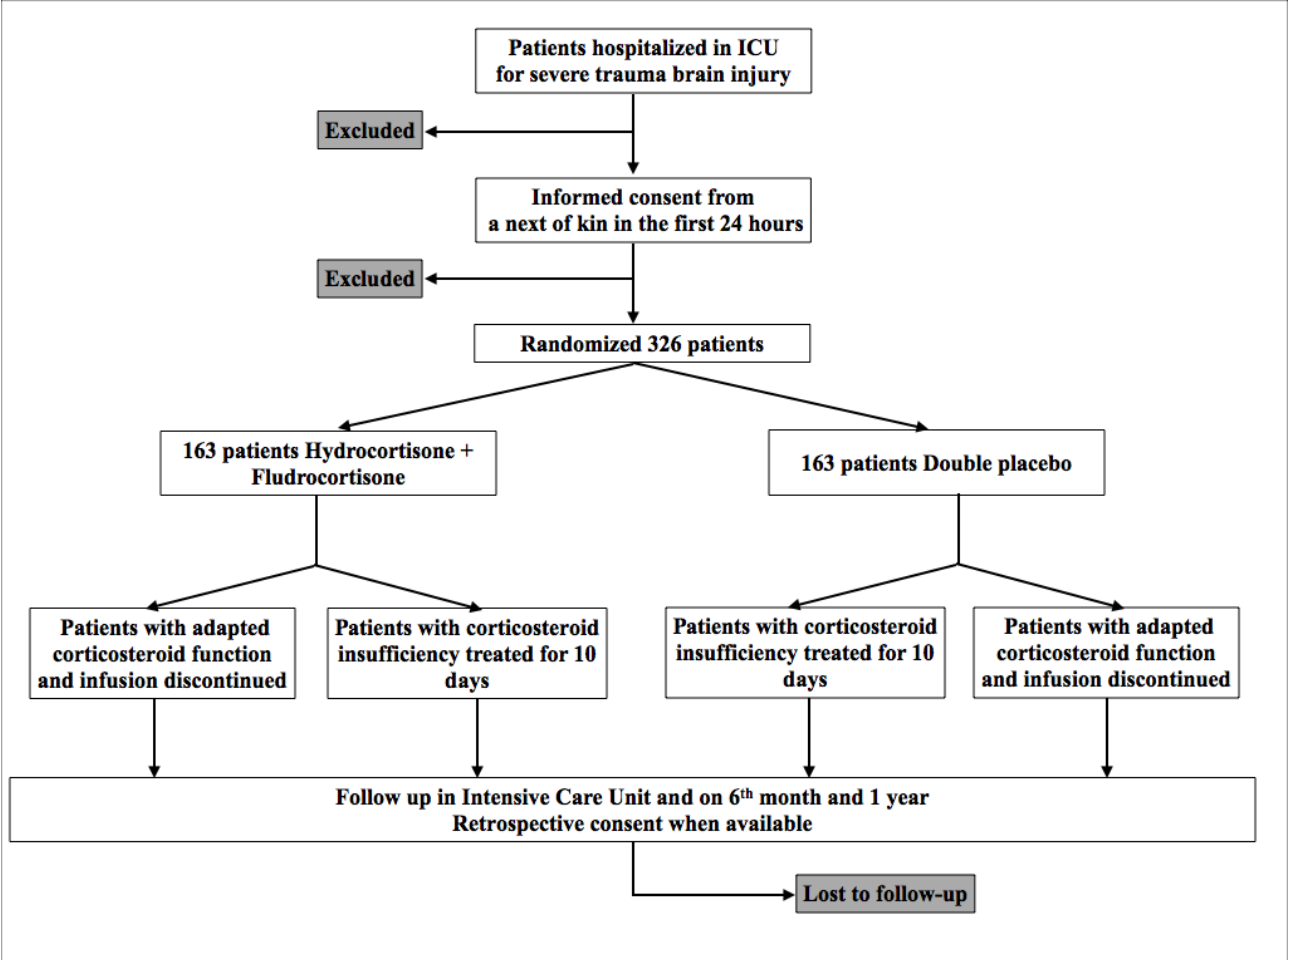

Supplement: MOESM1 [file 9618670]
